# Supplementary material
Source: PubMed Central journal article supplement (PMC5528195)
Supplement: NIHMS879823-supplement-Supplemental.pdf [file NIHMS879823-supplement-Supplemental.pdf]

**Supplementary Information**

**Prostate-specific membrane antigen targeted protein contrast agents  
for molecular imaging of prostate cancer by MRI**

Fan Pu<sup>a,b,#</sup>, Mani Salarian<sup>a,#</sup>, Shenghui Xue<sup>a,#</sup>, Jingjuan Qiao<sup>a,b</sup>, Jie Feng<sup>a</sup>, Shanshan Tan<sup>a</sup>, Anvi Patel<sup>a,b</sup>, Xin Li<sup>c</sup>,  
Kenza Mamouni<sup>c</sup>, Khan Hekmatyar<sup>d</sup>, Juan Zou<sup>a</sup>, Daqing Wu<sup>c</sup> and Jenny J. Yang<sup>a,\*</sup>

---

<sup>a</sup> Departments of Chemistry, Center for Diagnostics & Therapeutics, Georgia State University, Atlanta, GA 30303, USA.

<sup>b</sup> Inlighta Biosciences LLC, Marietta, GA 30068, USA

<sup>c</sup> Georgia Regents University Cancer Center, Augusta, GA 30912, USA.

<sup>d</sup> Bioluminescence Research Center, University of Georgia, Athens, GA, 30602, USA.

\* These authors contributed equally to this work.

## Supplementary Figures

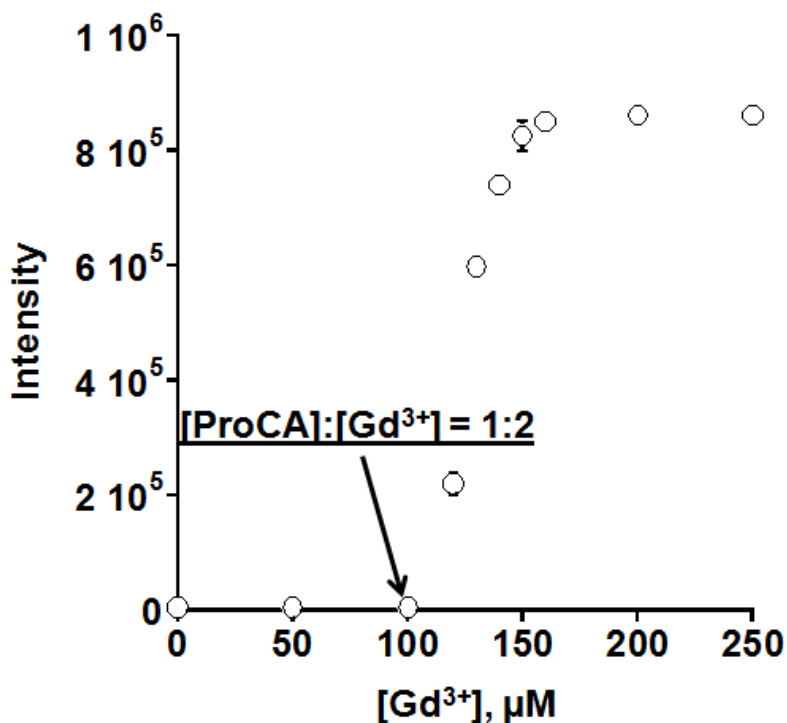

**Fig. S1.** Determination of  $Gd^{3+}$  loading stoichiometry and loading efficiency to protein MRI contrast agent (ProCA) using fluorescence titration. A  $Gd^{3+}$  responsive dye with low affinity, Rhod-5N, along with 50  $\mu M$  ProCA were added in 100 mM Tris/HCl, 100 mM KCl at pH 7.4. The Rhod-5N emission fluorescence spectrums between 560 and 650 nm were collected under different concentration of total  $Gd^{3+}$ . Any free  $Gd^{3+}$  in the solution can bind to Rhod-5N and cause fluorescence signal increase. There was no fluorescence change at total  $Gd^{3+}$  concentration of 100  $\mu M$  or below indicating that all the  $Gd^{3+}$  was loaded to ProCA with high efficiency when the ProCA to  $Gd^{3+}$  ratio was at 1:2 or above. The Rhod-5N fluorescence immediately increased when the total  $Gd^{3+}$  concentration was higher than 100  $\mu M$ , indicating that 50  $\mu M$  ProCA was saturated by 100  $\mu M$   $Gd^{3+}$  and additional free  $Gd^{3+}$  (with total  $Gd^{3+}$  concentration higher than 100  $\mu M$ ) bound to Rhod-5N causing fluorescence increase. In summary, this experiment demonstrated that  $Gd^{3+}$  can be loaded into ProCA at 2:1 ratio with high efficiency.

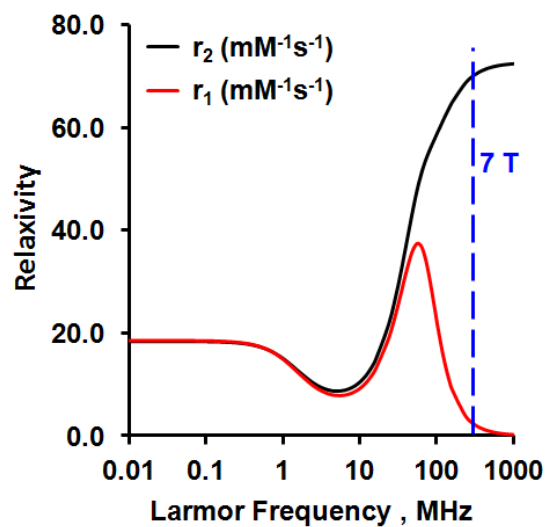

**Fig. S2.** Simulation of per Gd  $r_1$  and  $r_2$  relaxivities at different magnetic field strengths (0.01-1000 MHz).  $r_1$  and  $r_2$  were simulated using the given  $\tau_R$  (5 ns),  $\tau_m$  (100 ns),  $\tau_v$  (10 ps), and  $\Delta^2$  ( $5 \times 10^{19} \text{ s}^{-2}$ ).

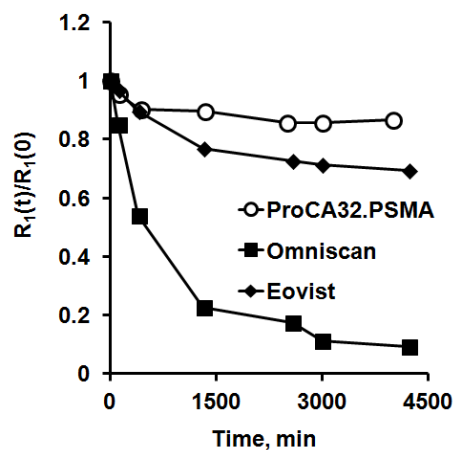

**Fig. S3.** Transmetallation study of ProCA32.PSMA in the presence of phosphate and  $\text{ZnCl}_2$ . The relaxation rates changes of clinical contrasts in phosphate buffer supplemented with  $\text{ZnCl}_2$  were measured according to previously reported method<sup>1</sup>. The relaxation rates change of ProCA32.PSMA was monitored with 110  $\mu\text{M}$  of ProCA32.PSMA loaded with 100  $\mu\text{M}$   $\text{Gd}^{3+}$ , 100  $\mu\text{M}$   $\text{ZnCl}_2$ , and 1.2 mM  $\text{PO}_4^{3-}$ .

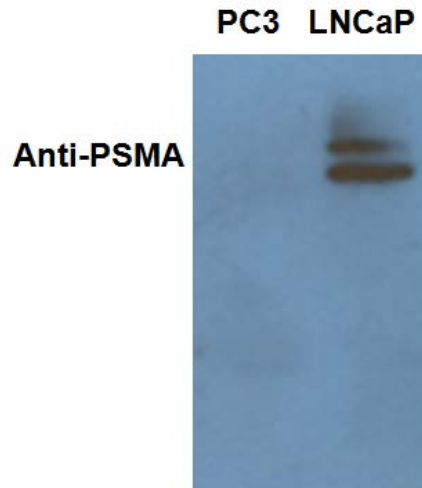

**Fig. S4.** PSMA expression on LNCaP and PC3 cells were identified by Western Blot using antibody against PSMA. PC3 cells do not have PSMA expression and LNCaP cells have PSMA expression.

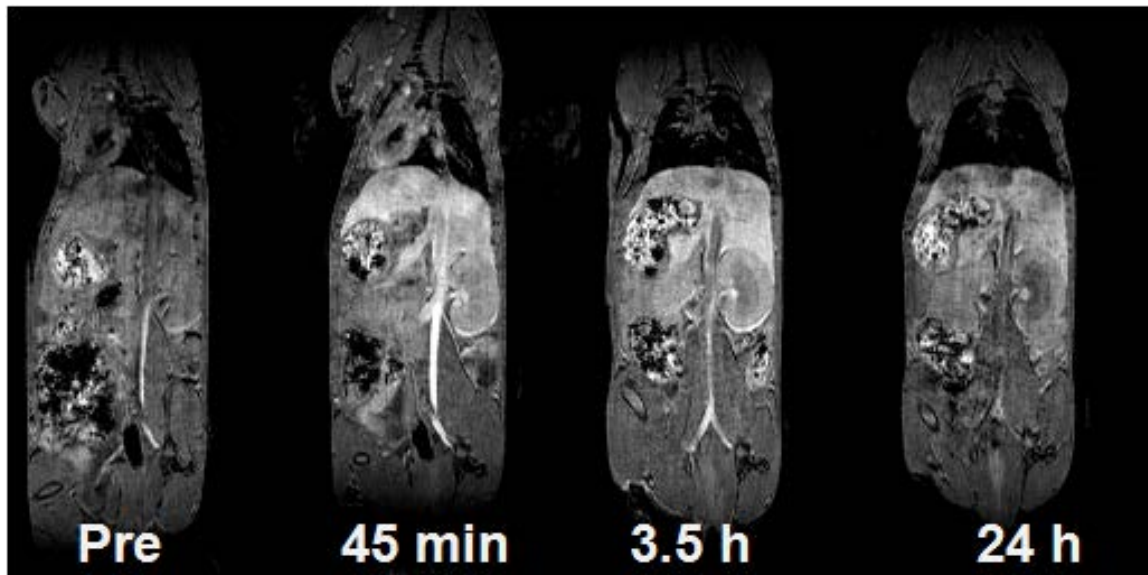

**Fig. S5.** Three dimensional T<sub>1</sub>-weighted MRI of normal mice before and after injection of ProCA32. ProCA32 is mainly distributed in the liver, kidney and blood at 45 min and 3.5 hours post injection of ProCA32.

## Supplementary Table

**Table S1.** Competitive binding assay to compare the Gd<sup>3+</sup> selectivity between ProCA32 and clinical contrast agent, Omniscan.

|                                          |     |     |     |      |
|------------------------------------------|-----|-----|-----|------|
| Omniscan                                 | +   | +   | +   | +    |
| heat                                     | -   | +   | +   | +    |
| Zn <sup>2+</sup>                         | -   | -   | +   | +    |
| ProCA32                                  | -   | -   | -   | +    |
| $r_1$ , mM <sup>-1</sup> s <sup>-1</sup> | 5.8 | 6.7 | 5.8 | 21.2 |

The per Gd  $r_1$  was measured at four different conditions. 1) the  $r_1$  of Omniscan (containing 20  $\mu$ M Gd-DTPA-BMA and 1  $\mu$ M Na[Ca-DTPA-BMA]) was determined at 37 °C. 2) Omniscan was heated at 95 °C for 30 min before measuring  $r_1$  at 37 °C. 3) Omniscan was incubated with 100  $\mu$ M ZnCl<sub>2</sub>, then heated at 95 °C for 30 min before measuring  $r_1$  at 37 °C. 4) Omniscan was incubated with 100  $\mu$ M ZnCl<sub>2</sub> and 20  $\mu$ M of ProCA32, heated at 95 °C for 30 min before measuring  $r_1$  at 37 °C. In condition 4, the  $r_1$  of the mixture increased to 21.2 mM<sup>-1</sup>s<sup>-1</sup>, indicating that most of the Gd<sup>3+</sup> in Omniscan was competed out by ProCA32 and Zn<sup>2+</sup>, and the released Gd<sup>3+</sup> bound to ProCA32 to generate high  $r_1$ .

## Supplementary Reference

1. S. Laurent, L. V. Elst, F. Copoix and R. N. Muller, *Investigative radiology*, 2001, 36, 115-122.
